# Supplementary material
Source: PubMed Central journal article supplement (PMC3740869)
Supplement: 1221899110_pnas.201221899SI.pdf [file 1221899110_pnas.201221899SI.pdf]

# Supporting Information

Ramakrishnaiah et al. 10.1073/pnas.1221899110

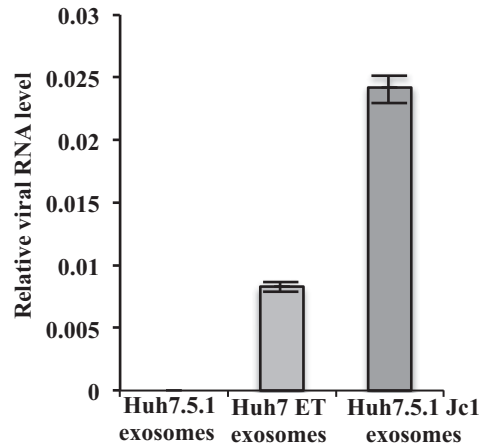

**Fig. S1.** Crude exosomes isolated from human hepatoma Huh7.5.1 cells, human hepatoma Huh7-ET subgenomic replicon cells or chimeric hepatitis C virus Jc1-infected Huh7.5.1 cells, contain hepatitis C virus genomic RNA, as detected by quantitative PCR. Exosomes from uninfected Huh7.5.1 cells do not contain viral RNA. Shown are the results in duplicates of three independent experiments.

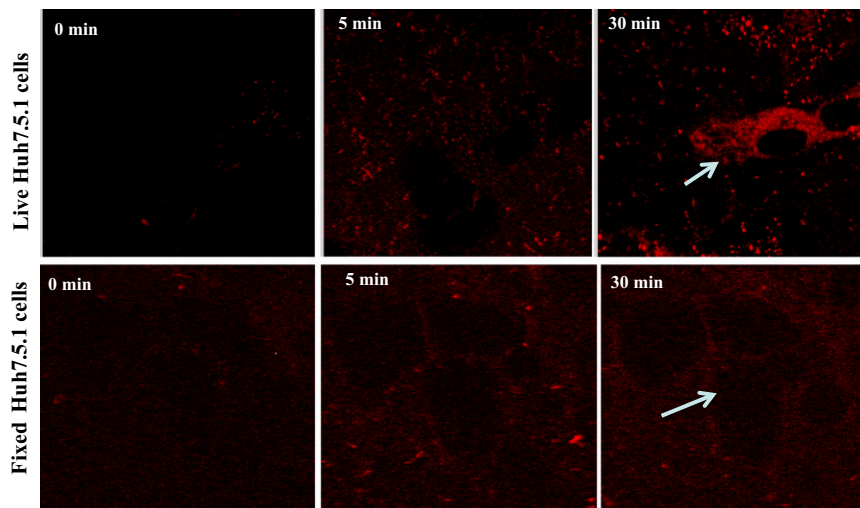

**Fig. S2.** Uptake of exosomes is an active process. Exosomes isolated from hepatoma cells were labeled with rhodamine C18. They were added to cells seeded on coverslips at time 0, and real-time confocal imaging for 30 min was performed on live Huh7.5.1 cells and paraformaldehyde fixed Huh7.5.1 cells. Live Huh7.5.1 cells took up rhodamine-labeled exosomes compared with fixed Huh7.5.1 cells that did not take up any exosomes. The arrows indicate the cells, and the red dots represent the exosomes labeled with rhodamine.

**Table S1. Characterization of patients used in neutralization studies**

| Patient ID | HCV genotype | Viral load, IU/mL  | Cryoglobulinemia | Exosome neutralization (% of free virus neutralization) |
|------------|--------------|--------------------|------------------|---------------------------------------------------------|
| 103        | 1a           | $9.77 \times 10^6$ | Weak positive    | 90                                                      |
| 105        | 3a           | $8.51 \times 10^5$ | Weak positive    | 85                                                      |
| 106        | 1a           | $9.77 \times 10^5$ | Negative         | 41                                                      |
| 109        | 1            | $1.12 \times 10^6$ | Negative         | >100                                                    |
| 111        | 3a           | $6.17 \times 10^5$ | Weak positive    | >100                                                    |
| 112        | 1b           | $5.62 \times 10^4$ | Negative         | >100                                                    |
| 137        | 1b           | $1.51 \times 10^5$ | Negative         | 46                                                      |
| 146        | 3a           | Not detectable     | Negative         | 9                                                       |
